# Supplementary material
Source: PubMed Central journal article supplement (PMC4036521)
Supplement: NIHMS475971-supplement-1.pdf [file NIHMS475971-supplement-1.pdf]

# **Lrf suppresses prostate cancer through repression of a Sox9-dependent pathway for cellular senescence bypass and tumor invasion**

Guocan Wang<sup>1,2,3,4\*</sup>, Andrea Lunardi<sup>1\*</sup>, Jianwen Zhang<sup>5</sup>, Zhenbang Chen<sup>3,4,10</sup>, Ugo Ala<sup>1</sup>, Kaitlyn A. Webster<sup>1</sup>, Yvonne Tay<sup>1</sup>, Enrique Gonzalez-Billalabeitia<sup>1</sup>, Ainara Egia<sup>1</sup>, David R. Shaffer<sup>3,4,11</sup>, Brett Carver<sup>6</sup>, Xue-Song Liu<sup>1</sup>, Riccardo Taulli<sup>1</sup>, Winston Patrick Kuo<sup>7</sup>, Caterina Nardella<sup>1,3,4,8</sup>, Sabina Signoretti<sup>9</sup>, Carlos Cordon-Cardo<sup>4,12</sup>, William L. Gerald<sup>4</sup> & Pier Paolo Pandolfi<sup>1,2,3,4</sup>

<sup>1</sup>Cancer Genetics Program, Beth Israel Deaconess Cancer Center, Departments of Medicine and Pathology, Beth Israel Deaconess Medical Center, Harvard Medical School, Boston, Massachusetts 02215, USA. <sup>2</sup>BCMB Program, Weill Graduate School of Medical Sciences, Cornell University, New York, New York 10021. <sup>3</sup>Cancer Biology and Genetics Program, Sloan-Kettering Institute, <sup>4</sup>Department of Pathology, Memorial Sloan-Kettering Cancer Center, 1275 York Avenue, New York, New York 10021, USA. <sup>5</sup>FAS Center for Systems Biology, Harvard University, Cambridge, Massachusetts 02138, USA. <sup>6</sup>Human Oncology and Pathogenesis Program, Department of Surgery, Memorial Sloan-Kettering Cancer Center, 1275 York Avenue, New York, New York 10021, USA. <sup>7</sup>Department of Developmental Biology, Harvard School Of Dental Medicine. <sup>8</sup>Preclinical Murine Pharmacogenetics Facility, Beth Israel Deaconess Medical Center, Harvard Medical School, Boston, MA 02115, USA. <sup>9</sup>Department of Pathology, Brigham and Women's Hospital, Harvard Medical School, Boston, MA, USA. Present addresses: <sup>10</sup>Department of Biochemistry and Cancer Biology, Meharry Medical College, 1005 Dr D. B. Todd Jr Boulevard, Nashville, Tennessee 37208-3599, USA. <sup>11</sup>Albany Medical Center 43 New Scotland Ave Albany, NY 12208. <sup>12</sup>Department of Genetics and Genomic Sciences, The Mount Sinai School of Medicine, New York, NY 10029, USA.

\*These authors contributed equally to this work.

Correspondence to: [ppandolf@bidmc.harvard.edu](mailto:ppandolf@bidmc.harvard.edu)

## **Supplementary Information:**

Supplementary Figures: 7

Supplementary Tables: 8

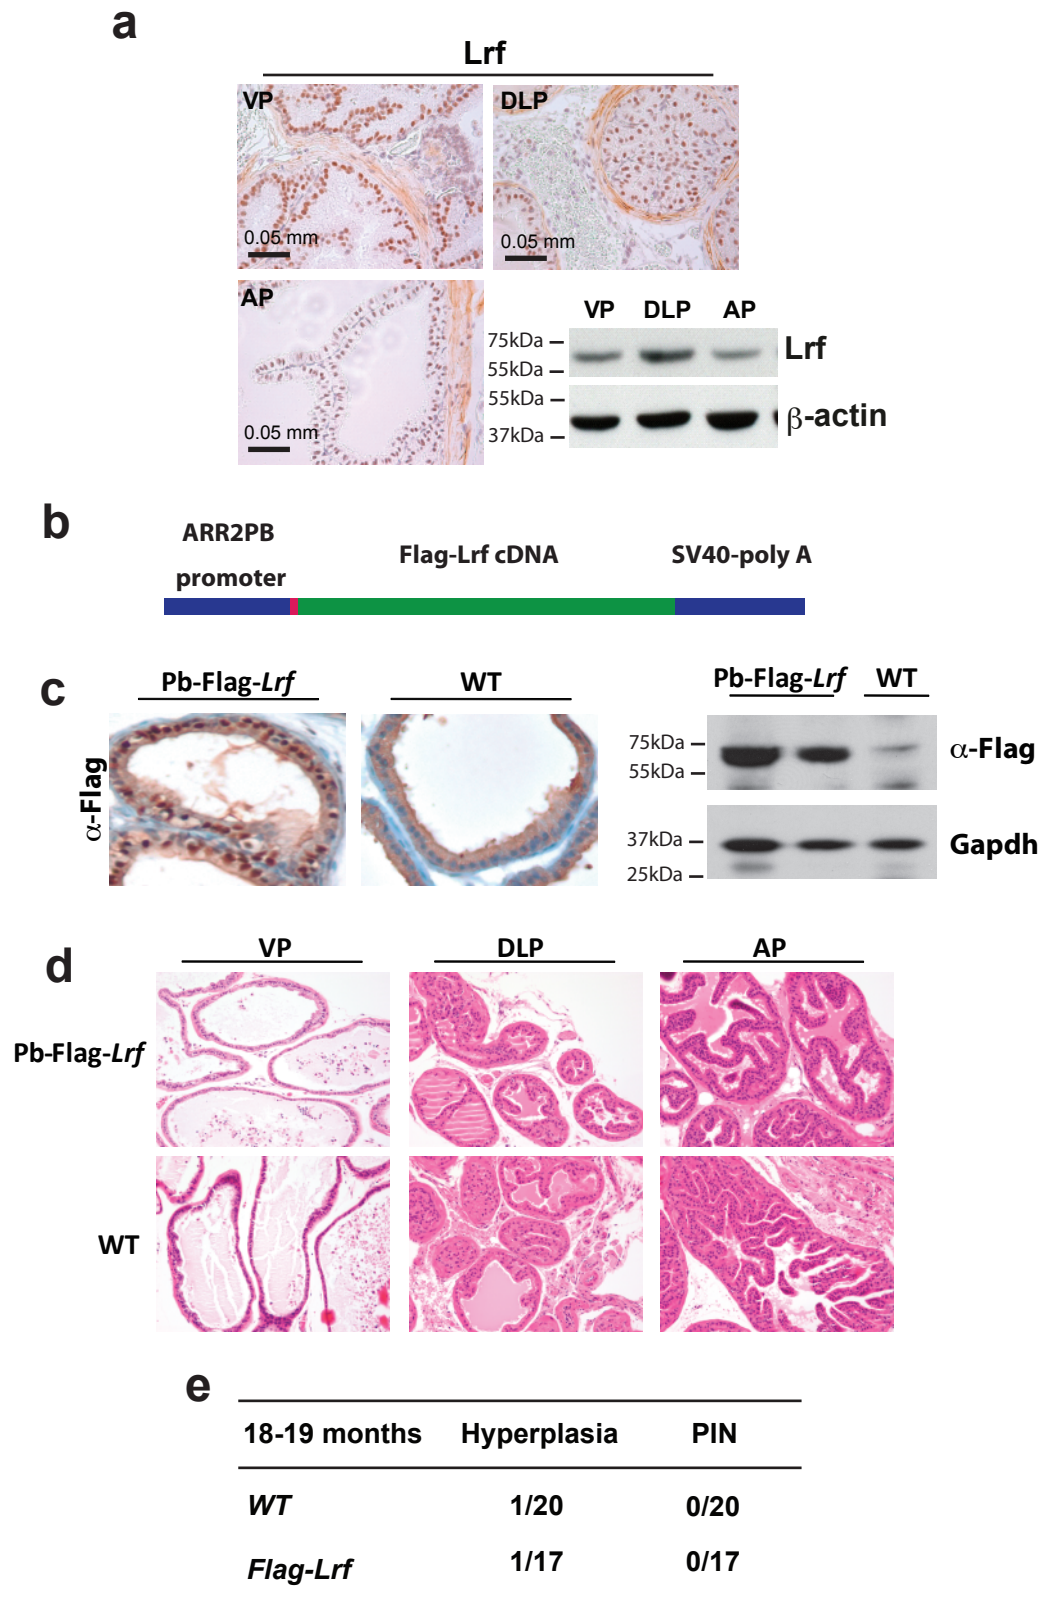

**Suppl. Figure 1. Lrf transgenic mice show no signs of prostate neoplasia. (a)** IHC and Western Blot analysis for Lrf expression in the three prostate lobes of 12 week-old WT mice. **(b)** Schematic representation of ARR2PB-Lrf construct. **(c)** IHC and Western Blot analysis for Flag-Lrf expression in the three prostate lobes of 16-18 month-old transgenic mice. **(d)** H&E of Anterior, Ventral, and Dorso-Lateral prostate lobes of WT and Lrf transgenic 16-18 month-old mice. **(e)** Incidence of prostate hyperplasia and PIN in WT and Lrf transgenic 16-18 month-old mice.

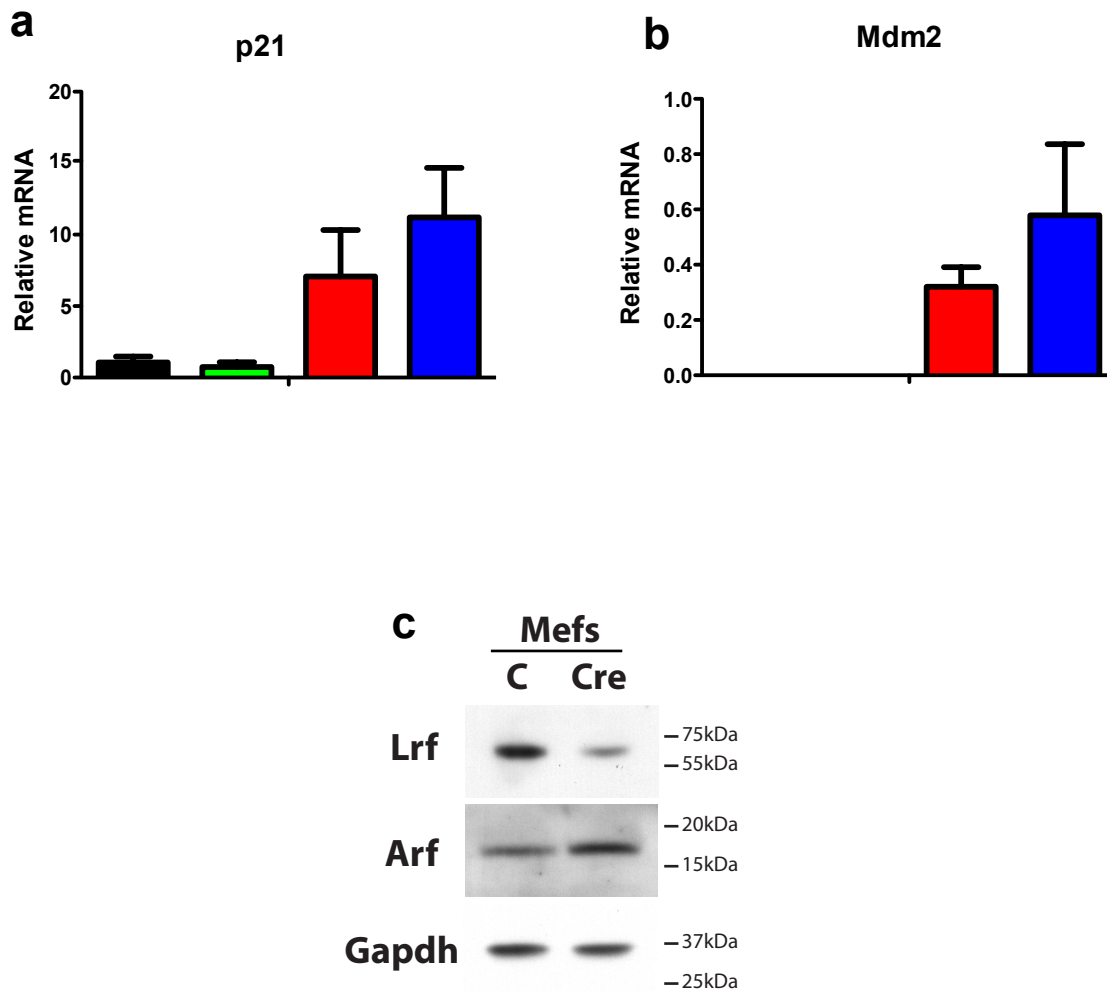

**Suppl. Figure 2. Loss of Lrf does not affect p53 functions.** (a-b) qPCR analysis of p21 and Mdm2 expression in *WT* (black bars), *Lrf<sup>lox/flox</sup>;Pb-Cre4* (green bars), *Pten<sup>lox/flox</sup>;Pb-Cre4* (red bars), and *Pten<sup>lox/flox</sup>;Lrf<sup>lox/flox</sup>;Pb-Cre4* (blue bars) prostates of  $n=3$ /genotype 12 week-old mice. Data are presented as mean  $\pm$  standard deviation. (c) WB analysis for Lrf and p19Arf in *Lrf<sup>lox/flox</sup>* mouse embryonic fibroblasts (MEFs) infected by Cre-recombinase or control vector.

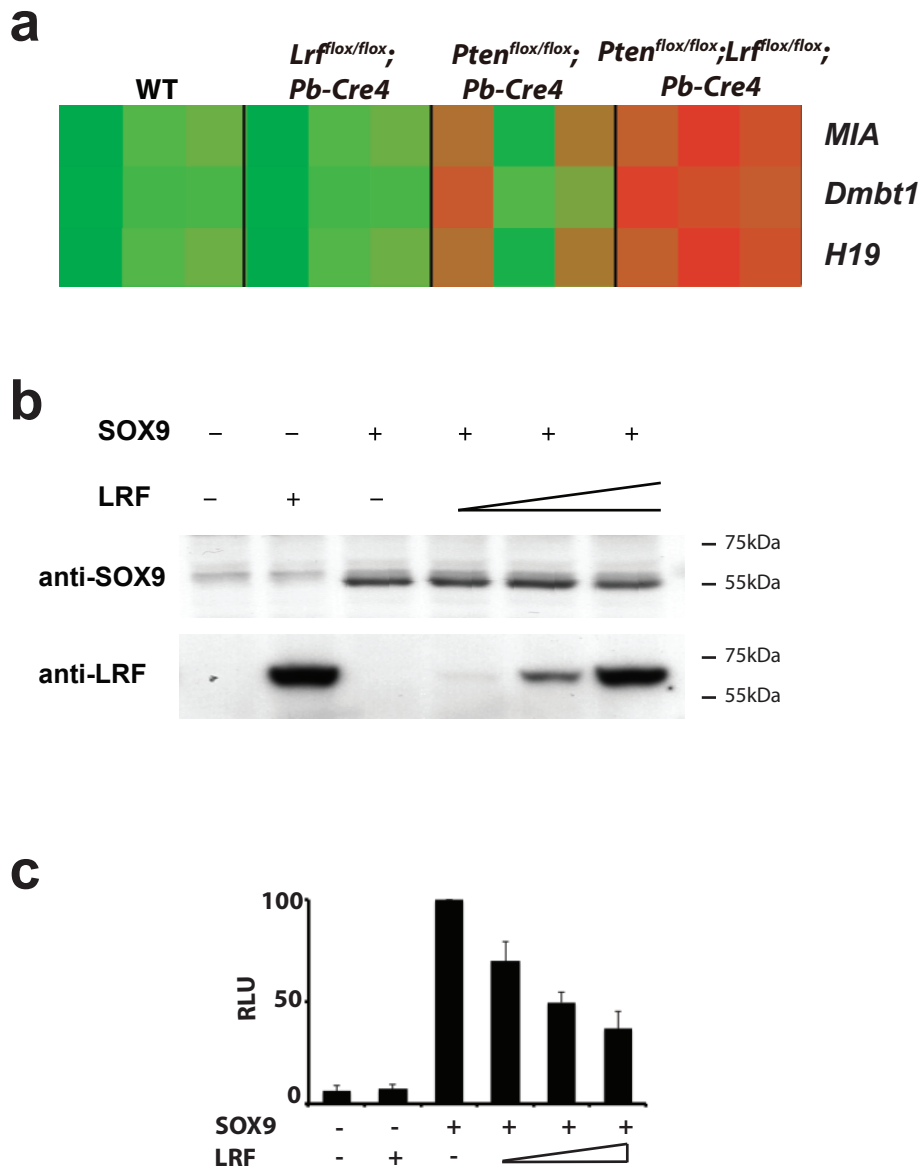

**Suppl. Figure 3. Loss of *Lrf* dictates *Sox9* transcriptional hyper-activity.** (a) Heat-map of three different *Sox9* transcriptional target genes (*Mia*, *Dmbt1*, and *H19*) in *WT*, *Lrf<sup>flox/flox</sup>;Pb-Cre4*, *Pten<sup>flox/flox</sup>;Pb-Cre4*, and *Pten<sup>flox/flox</sup>;Lrf<sup>flox/flox</sup>;Pb-Cre4* prostates of n=3/genotype 12 week-old mice. (b) WB analysis of SOX9 and LRF over-expression for the luciferase assay in PC3. (c) Dual-luciferase assay with a *Sox9*-reporter in DU145 cells shows that LRF suppresses the transcriptional activity of SOX9 in a dose-dependent manner.

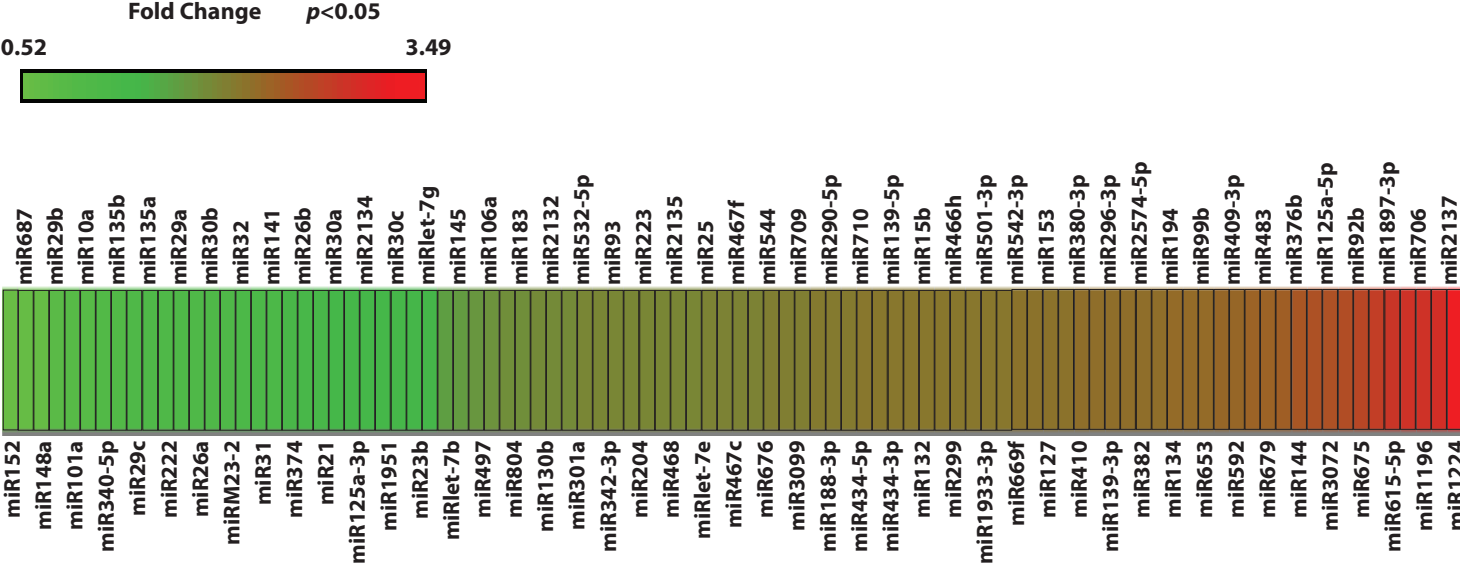

**Suppl. Figure 4. microRNA profiling.** Nanostring nCounter® Mouse miRNA Expression Assay Kit technology was used to analyze the miRNAs differentially expressed ( $p < 0.05$ ) in *Pten<sup>lox/lox</sup>;Lrf<sup>lox/lox</sup>;Pb-Cre4* versus *Pten<sup>lox/lox</sup>;Pb-Cre4* prostates of  $n=3$ /genotype 12 week-old mice.

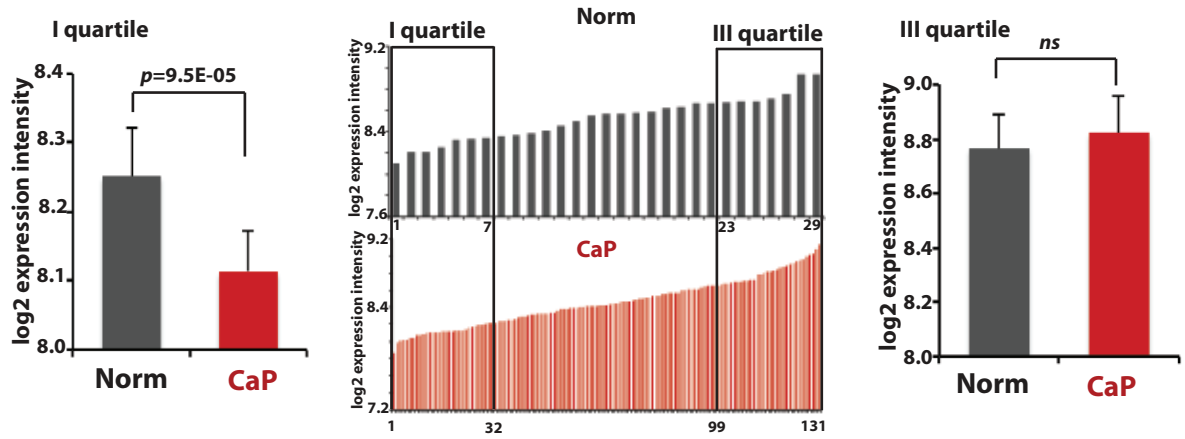

Suppl. Figure 5. LRF mRNA is significantly down-regulated in a subset of primary human prostate cancers (OncoPrint).



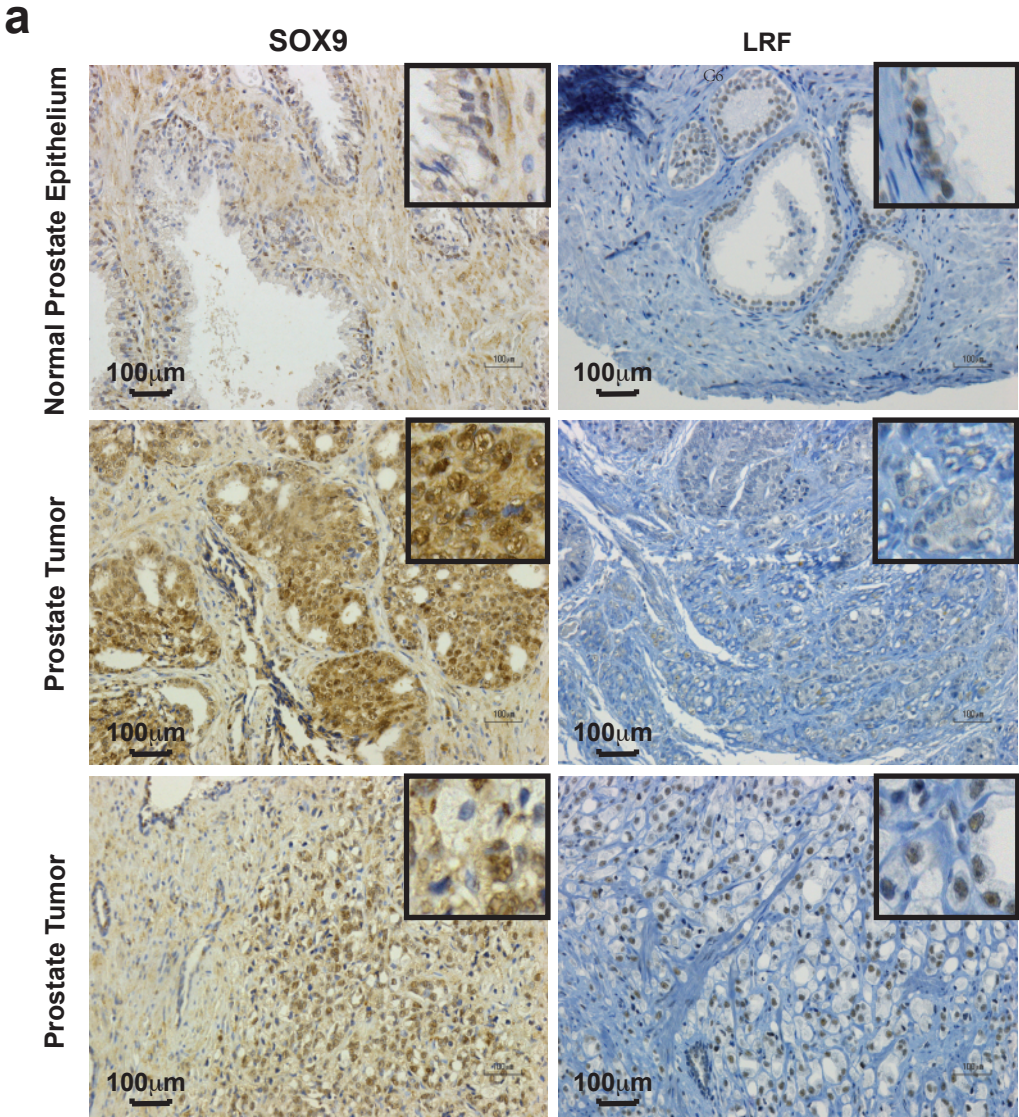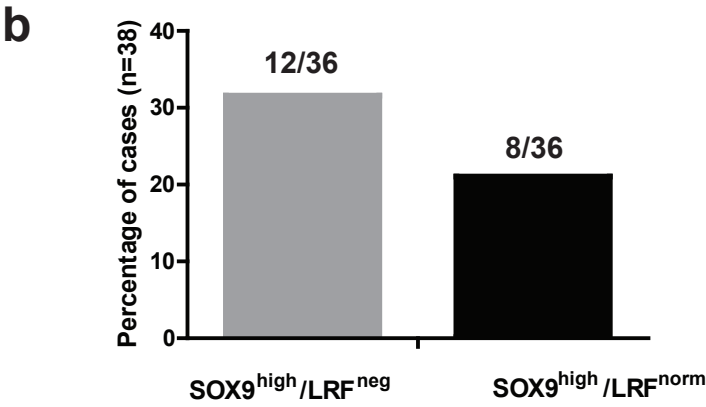

Suppl. Figure 7. Immunohistochemical staining for LRF and SOX9 in high Gleason score (8-10) prostate tumors. (a) Representative image of immunohistochemical staining of LRF and SOX9 in human prostate tumors. (b) Percentage of SOX9<sup>hi</sup>/LRF<sup>norm</sup> and SOX9<sup>hi</sup>/LRF<sup>neg</sup> in high Gleason score (8-10) prostate cancer (n=38).



## Suppl. Table 2: oPOSSUM analysis

a

| TF           | Background gene hits | Background gene non-hits | Target gene hits | Target gene non-hits | Background TFBS hits | Background TFBS rate | Target TFBS hits | Target TFBS rate | Z score | Fisher score | Fisher   |
|--------------|----------------------|--------------------------|------------------|----------------------|----------------------|----------------------|------------------|------------------|---------|--------------|----------|
| HNF1A        | 2552                 | 12598                    | 93               | 287                  | 3659                 | 0.0022               | 146              | 0.003            | 13.43   | 1.199e-04    | 1.20E-04 |
| Foxa2        | 8526                 | 6624                     | 242              | 138                  | 29104                | 0.0152               | 908              | 0.0159           | 5.253   | 2.231e-03    | 2.23E-03 |
| HLF          | 5181                 | 9969                     | 168              | 212                  | 9448                 | 0.0049               | 305              | 0.0054           | 5.095   | 4.129e-05    | 4.13E-05 |
| ELF5         | 12185                | 2965                     | 329              | 51                   | 73478                | 0.0287               | 2250             | 0.0296           | 4.518   | 1.177e-03    | 1.18E-03 |
| SRY          | 10985                | 4165                     | 298              | 82                   | 68971                | 0.0269               | 2111             | 0.0278           | 4.306   | 5.456e-03    | 5.46E-03 |
| <b>SOX9*</b> | 8854                 | 6296                     | 250              | 130                  | 29087                | 0.0114               | 904              | 0.0119           | 4.181   | 2.225e-03    | 2.23E-03 |
| Ar           | 585                  | 14565                    | 19               | 361                  | 619                  | 0.0006               | 22               | 0.0007           | 3.948   | 1.582e-01    | 1.58E-01 |
| REL          | 7798                 | 7352                     | 232              | 148                  | 18677                | 0.0081               | 583              | 0.0085           | 3.866   | 1.281e-04    | 1.28E-04 |
| SRF          | 713                  | 14437                    | 23               | 357                  | 793                  | 0.0004               | 28               | 0.0005           | 3.16    | 1.372e-01    | 1.37E-01 |
| Foxq1        | 5673                 | 9477                     | 166              | 214                  | 12614                | 0.006                | 392              | 0.0063           | 3.027   | 8.009e-03    | 8.01E-03 |

b

| TF           | Background gene hits | Background gene non-hits | Target gene hits | Target gene non-hits | Background TFBS hits | Background TFBS rate | Target TFBS hits | Target TFBS rate | Z score | Fisher score | Fisher   |
|--------------|----------------------|--------------------------|------------------|----------------------|----------------------|----------------------|------------------|------------------|---------|--------------|----------|
| SRF          | 713                  | 14437                    | 29               | 248                  | 793                  | 0.0004               | 46               | 0.001            | 20.17   | 7.083e-05    | 7.08E-05 |
| TAL1-TCF3    | 5459                 | 9691                     | 132              | 145                  | 10058                | 0.0052               | 293              | 0.0061           | 8.706   | 5.608e-05    | 5.61E-05 |
| Roaz         | 4281                 | 10869                    | 110              | 167                  | 7214                 | 0.0047               | 205              | 0.0053           | 6.756   | 3.172e-05    | 3.17E-05 |
| Sox5         | 11256                | 3894                     | 226              | 51                   | 73449                | 0.0223               | 1954             | 0.0236           | 6.584   | 2.827e-03    | 2.83E-03 |
| Ar           | 585                  | 14565                    | 20               | 257                  | 619                  | 0.0006               | 21               | 0.0008           | 6.422   | 6.531e-03    | 6.53E-03 |
| TLX1-NFIC    | 811                  | 14339                    | 26               | 251                  | 879                  | 0.0005               | 29               | 0.0007           | 5.449   | 4.646e-03    | 4.65E-03 |
| Pax6         | 1024                 | 14126                    | 24               | 253                  | 1165                 | 0.0007               | 36               | 0.0009           | 4.597   | 1.310e-01    | 1.31E-01 |
| Hand1-Tcfe2a | 10659                | 4491                     | 225              | 52                   | 44947                | 0.0195               | 1179             | 0.0203           | 4.556   | 2.877e-05    | 2.88E-05 |
| Foxq1        | 5673                 | 9477                     | 120              | 157                  | 12614                | 0.006                | 341              | 0.0065           | 4.399   | 2.701e-02    | 2.70E-02 |
| NHLH1        | 4534                 | 10616                    | 117              | 160                  | 7563                 | 0.0039               | 207              | 0.0043           | 4.191   | 1.125e-05    | 1.13E-05 |

**a**

| Top Canonical Pathways                       |          |                |
|----------------------------------------------|----------|----------------|
| Name                                         | p-value  | Ratio          |
| Virus Entry via Endocytic Pathways           | 5.53E-07 | 16/99 (0.162)  |
| ILK Signaling                                | 2E-06    | 23/192 (0.12)  |
| LPS/IL-1 Mediated Inhibition of RXR Function | 1.1E-05  | 24/239 (0.1)   |
| Tight Junction Signaling                     | 1.56E-05 | 19/161 (0.118) |
| Integrin Signaling                           | 1.75E-05 | 22/207 (0.106) |

**b**

| Top Networks |                                                                                                                           |       |
|--------------|---------------------------------------------------------------------------------------------------------------------------|-------|
| ID           | Associated Network Functions                                                                                              | Score |
| 1            | Cancer, Cellular Development, Tumor Morphology                                                                            | 43    |
| 2            | Post-Translational Modification, Cellular Function and Maintenance, Skeletal and Muscular System Development and Function | 36    |
| 3            | Drug Metabolism, Protein Synthesis, Glutathione Depletion In Liver                                                        | 36    |
| 4            | Neurological Disease, Psychological Disorders, Carbohydrate Metabolism                                                    | 36    |
| 5            | Cellular Movement, Tissue Development, Nervous System Development and Function                                            | 36    |

**c**

| Top Bio Functions                                     |                     |            |
|-------------------------------------------------------|---------------------|------------|
| Diseases and Disorders                                | p-value             | # Molecule |
| Cancer                                                | 1.40E-21 - 6.71E-03 | 311        |
| Reproductive System Disease                           | 5.16E-20 - 4.87E-03 | 173        |
| Gastrointestinal Disease                              | 4.44E-12 - 6.57E-03 | 155        |
| Organismal Injury and Abnormalities                   | 4.54E-05 - 6.05E-03 | 63         |
| Hereditary Disorder                                   | 6.80E-05 - 5.36E-03 | 40         |
| Molecular and Cellular Functions                      | p-value             | # Molecule |
| Cellular Movement                                     | 5.16E-10 - 6.70E-03 | 151        |
| Cell Death and Survival                               | 6.82E-09 - 6.19E-03 | 222        |
| Cellular Growth and Proliferation                     | 6.13E-08 - 6.25E-03 | 235        |
| Cellular Assembly and Organization                    | 3.30E-07 - 6.57E-03 | 146        |
| Cellular Function and Maintenance                     | 3.30E-07 - 6.32E-03 | 144        |
| Physiological System Development and Function         | p-value             | # Molecule |
| Organismal Development                                | 5.43E-07 - 6.82E-03 | 151        |
| Cardiovascular System Development and Function        | 8.69E-07 - 6.05E-03 | 133        |
| Organ Morphology                                      | 2.11E-06 - 6.82E-03 | 124        |
| Skeletal and Muscular System Development and Function | 2.11E-06 - 6.82E-03 | 113        |
| Tissue Morphology                                     | 2.39E-06 - 6.58E-03 | 165        |

**d**

| Top Molecules            |            |                          |            |
|--------------------------|------------|--------------------------|------------|
| Log Ratio up-regulated   |            | Log Ratio down-regulated |            |
| Molecules                | Exp. Value | Molecules                | Exp. Value |
| SPINK1                   | ↑6.009     | XAF1*                    | ↓-6.066    |
| REG3A*                   | ↑5.483     | TNNC2                    | ↓-3.197    |
| REG1A                    | ↑4.769     | PRR9                     | ↓-3.185    |
| MIA                      | ↑4.340     | CPA3                     | ↓-2.781    |
| Muc2 (includes EG:17831) | ↑4.334     | MYH11                    | ↓-2.479    |
| CLCA1                    | ↑4.333     | INMT                     | ↓-2.459    |
| H19                      | ↑4.246     | PCP4                     | ↓-2.431    |
| ONECUT2*                 | ↑4.087     | SYNPO2*                  | ↓-2.431    |
| CXCL6                    | ↑4.071     | Defb1*                   | ↓-2.408    |
| KRT20                    | ↑3.954     | ACTA2*                   | ↓-2.303    |

# Suppl. Table 4: GSEA analysis

| C2 Gene Signature |                                        | SIZE | ES   | NES  | NOM p-val | FDR q-val | FWER p-val | RANK AT MAX | LEADING EDGE                    |
|-------------------|----------------------------------------|------|------|------|-----------|-----------|------------|-------------|---------------------------------|
| 1                 | HSA03022_BASAL_TRANSCRIPTION_FACTORS   | 15   | 0.71 | 2.08 | 0.000     | 0.074     | 0.064      | 860         | tags=40%, list=13%, signal=46%  |
| 2                 | UVB_NHEK3_C2                           | 30   | 0.57 | 1.98 | 0.000     | 0.152     | 0.234      | 1913        | tags=63%, list=28%, signal=88%  |
| 3                 | LAL_KO_3MO_UP                          | 22   | 0.58 | 1.83 | 0.004     | 0.501     | 0.746      | 960         | tags=41%, list=14%, signal=47%  |
| 4                 | HYPOXIA_REVIEW                         | 53   | 0.46 | 1.81 | 0.002     | 0.465     | 0.812      | 1051        | tags=34%, list=15%, signal=40%  |
| 5                 | HYPOXIA_REG_UP                         | 22   | 0.56 | 1.79 | 0.005     | 0.462     | 0.870      | 978         | tags=41%, list=14%, signal=48%  |
| 6                 | AS3_FIBRO_DN                           | 19   | 0.59 | 1.79 | 0.006     | 0.388     | 0.872      | 1547        | tags=53%, list=23%, signal=68%  |
| 7                 | LEE_DENA_UP                            | 41   | 0.47 | 1.78 | 0.004     | 0.359     | 0.896      | 915         | tags=29%, list=13%, signal=34%  |
| 8                 | LAL_KO_6MO_UP                          | 28   | 0.52 | 1.77 | 0.002     | 0.354     | 0.928      | 960         | tags=39%, list=14%, signal=46%  |
| 9                 | CHEN_HOXA5_TARGETS_UP                  | 112  | 0.39 | 1.77 | 0.000     | 0.318     | 0.929      | 2096        | tags=46%, list=31%, signal=66%  |
| 10                | DEATHPATHWAY                           | 16   | 0.59 | 1.77 | 0.009     | 0.286     | 0.929      | 1710        | tags=56%, list=25%, signal=75%  |
| 11                | UVB_NHEK3_ALL                          | 284  | 0.34 | 1.76 | 0.000     | 0.279     | 0.939      | 1631        | tags=36%, list=24%, signal=45%  |
| 12                | ZHAN_MULTIPLE_MYELOMA_VS_NORMAL_DN     | 20   | 0.56 | 1.73 | 0.008     | 0.337     | 0.972      | 84          | tags=15%, list=1%, signal=15%   |
| 13                | HSA03050_PROTEASOME                    | 16   | 0.57 | 1.72 | 0.006     | 0.331     | 0.979      | 2683        | tags=88%, list=39%, signal=144% |
| 14                | UVB_SCC_DN                             | 69   | 0.41 | 1.72 | 0.004     | 0.325     | 0.985      | 1636        | tags=41%, list=24%, signal=53%  |
| 15                | ET743_SARCOMA_DN                       | 171  | 0.36 | 1.71 | 0.000     | 0.311     | 0.986      | 1887        | tags=41%, list=28%, signal=55%  |
| 16                | UVB_SCC_UP                             | 67   | 0.41 | 1.71 | 0.000     | 0.301     | 0.987      | 1576        | tags=40%, list=23%, signal=52%  |
| 17                | HINATA_NFKB_UP                         | 59   | 0.42 | 1.71 | 0.000     | 0.287     | 0.988      | 1561        | tags=39%, list=23%, signal=50%  |
| 18                | FLECHNER_KIDNEY_TRANSPLANT_WELL_PBL_DN | 25   | 0.51 | 1.69 | 0.015     | 0.315     | 0.990      | 1226        | tags=48%, list=18%, signal=58%  |
| 19                | LINDSTEDT_DEND_8H_VS_48H_UP            | 30   | 0.50 | 1.69 | 0.009     | 0.308     | 0.990      | 408         | tags=27%, list=6%, signal=28%   |
| 20                | CELL_MOTILITY                          | 57   | 0.42 | 1.67 | 0.002     | 0.334     | 0.997      | 1759        | tags=47%, list=26%, signal=63%  |

  

| C4 Gene Signature |              | SIZE | ES   | NES  | NOM p-val | FDR q-val | FWER p-val | RANK AT MAX | LEADING EDGE                    |
|-------------------|--------------|------|------|------|-----------|-----------|------------|-------------|---------------------------------|
| 1                 | GCM_CFBF     | 53   | 0.52 | 2.04 | 0.000     | 0.049     | 0.048      | 2063        | tags=58%, list=30%, signal=83%  |
| 2                 | MODULE_239   | 85   | 0.46 | 2.02 | 0.000     | 0.032     | 0.062      | 2085        | tags=52%, list=31%, signal=74%  |
| 3                 | GNF2_TDG     | 23   | 0.61 | 1.99 | 0.002     | 0.029     | 0.084      | 2027        | tags=74%, list=30%, signal=105% |
| 4                 | GNF2_KPNB1   | 53   | 0.50 | 1.97 | 0.000     | 0.029     | 0.107      | 2060        | tags=62%, list=30%, signal=89%  |
| 5                 | GNF2_UBE2I   | 18   | 0.62 | 1.91 | 0.002     | 0.055     | 0.236      | 1834        | tags=72%, list=27%, signal=99%  |
| 6                 | GNF2_XRCC5   | 58   | 0.48 | 1.90 | 0.000     | 0.051     | 0.258      | 2159        | tags=57%, list=32%, signal=83%  |
| 7                 | MODULE_233   | 17   | 0.64 | 1.89 | 0.004     | 0.048     | 0.282      | 2062        | tags=71%, list=30%, signal=101% |
| 8                 | MODULE_342   | 115  | 0.40 | 1.83 | 0.000     | 0.077     | 0.457      | 1474        | tags=43%, list=22%, signal=55%  |
| 9                 | MODULE_295   | 15   | 0.62 | 1.78 | 0.008     | 0.109     | 0.626      | 647         | tags=40%, list=9%, signal=44%   |
| 10                | MODULE_91    | 30   | 0.51 | 1.77 | 0.006     | 0.107     | 0.661      | 2713        | tags=87%, list=40%, signal=143% |
| 11                | GNF2_BNIP2   | 23   | 0.55 | 1.76 | 0.006     | 0.108     | 0.698      | 1675        | tags=65%, list=25%, signal=86%  |
| 12                | MODULE_357   | 39   | 0.48 | 1.76 | 0.010     | 0.100     | 0.701      | 1520        | tags=51%, list=22%, signal=66%  |
| 13                | GNF2_APEX1   | 65   | 0.43 | 1.76 | 0.000     | 0.094     | 0.704      | 2027        | tags=48%, list=30%, signal=67%  |
| 14                | MODULE_139   | 48   | 0.45 | 1.76 | 0.002     | 0.088     | 0.708      | 1121        | tags=40%, list=16%, signal=47%  |
| 15                | MODULE_297   | 38   | 0.48 | 1.75 | 0.008     | 0.090     | 0.736      | 1520        | tags=50%, list=22%, signal=64%  |
| 16                | GCM_RAD21    | 27   | 0.52 | 1.74 | 0.008     | 0.089     | 0.752      | 1913        | tags=56%, list=28%, signal=77%  |
| 17                | GCM_ZNF198   | 64   | 0.42 | 1.73 | 0.000     | 0.090     | 0.776      | 2592        | tags=70%, list=38%, signal=112% |
| 18                | MORF_PPP2R5E | 53   | 0.43 | 1.71 | 0.008     | 0.102     | 0.825      | 1603        | tags=47%, list=24%, signal=61%  |
| 19                | MODULE_181   | 69   | 0.41 | 1.71 | 0.002     | 0.099     | 0.830      | 1010        | tags=30%, list=15%, signal=35%  |
| 20                | MODULE_154   | 35   | 0.48 | 1.71 | 0.008     | 0.095     | 0.833      | 1520        | tags=51%, list=22%, signal=66%  |

  

| C5 Gene Signature |                                                                                                | SIZE | ES   | NES  | NOM p-val | FDR q-val | FWER p-val | RANK AT MAX | LEADING EDGE                    |
|-------------------|------------------------------------------------------------------------------------------------|------|------|------|-----------|-----------|------------|-------------|---------------------------------|
| 1                 | CHROMATIN                                                                                      | 20   | 0.61 | 1.93 | 0.000     | 0.295     | 0.214      | 721         | tags=30%, list=11%, signal=33%  |
| 2                 | TRANSFERASE_ACTIVITY__TRANSFERRING_ACYL_GROUPS                                                 | 28   | 0.52 | 1.81 | 0.008     | 0.473     | 0.547      | 2522        | tags=79%, list=37%, signal=124% |
| 3                 | CARBON_OXYGEN_LYASE_ACTIVITY                                                                   | 16   | 0.60 | 1.81 | 0.008     | 0.330     | 0.561      | 647         | tags=44%, list=9%, signal=48%   |
| 4                 | SMALL_GTPASE_REGULATOR_ACTIVITY                                                                | 30   | 0.51 | 1.78 | 0.008     | 0.335     | 0.659      | 1763        | tags=50%, list=26%, signal=67%  |
| 5                 | TRANSFERASE_ACTIVITY__TRANSFERRING_GROUPS_OTHER_THAN_AMINO_ACYL_GROUPS                         | 22   | 0.55 | 1.77 | 0.011     | 0.281     | 0.679      | 2522        | tags=82%, list=37%, signal=129% |
| 6                 | CYTOPLASMIC_MEMBRANE_BOUND_VESICLE                                                             | 66   | 0.42 | 1.72 | 0.005     | 0.382     | 0.832      | 1028        | tags=29%, list=15%, signal=34%  |
| 7                 | CYTOPLASMIC_VESICLE_MEMBRANE                                                                   | 18   | 0.55 | 1.71 | 0.013     | 0.376     | 0.877      | 0           | tags=6%, list=0%, signal=6%     |
| 8                 | MEMBRANE_BOUND_VESICLE                                                                         | 67   | 0.41 | 1.70 | 0.002     | 0.340     | 0.890      | 1028        | tags=28%, list=15%, signal=33%  |
| 9                 | CYTOPLASMIC_VESICLE                                                                            | 67   | 0.41 | 1.69 | 0.006     | 0.325     | 0.907      | 1028        | tags=28%, list=15%, signal=33%  |
| 10                | LIPID_METABOLIC_PROCESS                                                                        | 148  | 0.36 | 1.69 | 0.000     | 0.293     | 0.907      | 1112        | tags=28%, list=16%, signal=32%  |
| 11                | VESICLE                                                                                        | 69   | 0.40 | 1.68 | 0.007     | 0.293     | 0.925      | 1028        | tags=28%, list=15%, signal=32%  |
| 12                | CYTOPLASMIC_VESICLE_PART                                                                       | 18   | 0.55 | 1.66 | 0.010     | 0.319     | 0.963      | 0           | tags=6%, list=0%, signal=6%     |
| 13                | DEFENSE_RESPONSE                                                                               | 81   | 0.38 | 1.65 | 0.002     | 0.325     | 0.972      | 1096        | tags=25%, list=16%, signal=29%  |
| 14                | ATPASE_ACTIVITY__COUPLED_TO_MOVEMENT_OF_SUBSTANCES                                             | 23   | 0.50 | 1.65 | 0.013     | 0.305     | 0.972      | 1820        | tags=48%, list=27%, signal=65%  |
| 15                | HYDROLASE_ACTIVITY__ACTING_ON_ACID_ANHYDRIDES__CATALYZING_TRANSMEMBRANE_MOVEMENT_OF_SUBSTANCES | 22   | 0.51 | 1.64 | 0.010     | 0.298     | 0.977      | 1820        | tags=50%, list=27%, signal=68%  |
| 16                | VESICLE_MEMBRANE                                                                               | 19   | 0.52 | 1.60 | 0.019     | 0.376     | 0.992      | 0           | tags=5%, list=0%, signal=5%     |
| 17                | ANATOMICAL_STRUCTURE_MORPHOGENESIS                                                             | 152  | 0.34 | 1.60 | 0.000     | 0.371     | 0.994      | 1120        | tags=26%, list=16%, signal=30%  |
| 18                | GUANYL_NUCLEOTIDE_EXCHANGE_FACTOR_ACTIVITY                                                     | 19   | 0.51 | 1.54 | 0.031     | 0.528     | 1.000      | 848         | tags=32%, list=12%, signal=36%  |
| 19                | GTPASE_REGULATOR_ACTIVITY                                                                      | 65   | 0.37 | 1.54 | 0.011     | 0.509     | 1.000      | 925         | tags=26%, list=14%, signal=30%  |
| 20                | TRANSMEMBRANE_RECEPTOR_PROTEIN_TYROSINE_KINASE_SIGNALING_PATHWAY                               | 47   | 0.40 | 1.53 | 0.024     | 0.529     | 1.000      | 1381        | tags=38%, list=20%, signal=48%  |

**Suppl. Table 5: E2F transcriptional target genes**

| GENE SYMBOL   | REFERENCES                                              |
|---------------|---------------------------------------------------------|
| H19           | Berteaux N, <i>et al</i> , The J Biol Chem, 2006        |
| MMP7          | Johnson J.L. <i>et al</i> ., Canc Res, 2011             |
| MMP14         | Johnson J.L. <i>et al</i> ., Canc Res, 2011             |
| MMP23         | Johnson J.L. <i>et al</i> ., Canc Res, 2011             |
| WASF1         | Iwanaga R. <i>et al</i> ., Oncogene, 2006               |
| BNIP3         | Gang H. <i>et al</i> ., Pediatr Cardiol, 2011           |
| BSG           | Tarin C. <i>et al</i> ., Free Rad Biol & Med, 2011      |
| CDT1          | Yoshida K. <i>et al</i> ., Oncogene, 2004               |
| CcnD1         | Lee R.J. <i>et al</i> ., Mol Cell Biol, 2000            |
| APAF1         | Furukawa Y. <i>et al</i> ., The J Biol Chem, 2002       |
| BIN1          | Cassimere E.K. <i>et al</i> ., Cell Death Diff, 2009    |
| Casp3         | Nahle Z. <i>et al</i> ., Nat Cell Biol, 2002            |
| H2Ax          | Yagi H. <i>et al</i> ., The J Biol Chem, 1995           |
| Kpn $\beta$ 1 | Van der Watt P.J. <i>et al</i> ., PLoS ONE, 2011        |
| ASK1          | Kherrouche Z. <i>et al</i> ., Biochem J, 2006           |
| MCM7          | Bruemmer D. <i>et al</i> ., Bioch Biophys Res Com, 2003 |
| MYB           | Sahin F., Sladek T.L., Int J Biol Sci, 2010             |
| PTTG1         | Zhou C. <i>et al</i> ., Mol Endocrinol, 2009            |
| SLC44A1       | Yuan Z. <i>et al</i> ., Physiol Genomics, 2006          |
| SOX2          | O'Connor M.D. <i>et al</i> ., Exp Hematol, 2011         |
| SP3           | Tapias A. <i>et al</i> ., Bioch Biophys Acta, 2008      |
| WNT4          | Devgan V. <i>et al</i> ., Genes Dev, 2005               |
| YAP1          | Cheng L. <i>et al</i> ., Oncogene, 2010                 |

## Suppl. Table 6: Expression profile datasets analysis

Sheet1

| Study             | Platform                 | Data source   | Probesets ID | Probeset sequence analysis <sup>1</sup><br>(when applicable) | Signal quality control <sup>2</sup><br>(when applicable) | Use | Behavior <sup>3</sup> | Reference                                   |
|-------------------|--------------------------|---------------|--------------|--------------------------------------------------------------|----------------------------------------------------------|-----|-----------------------|---------------------------------------------|
| <b>Tomlins</b>    | spotted cDNA             | GEO data      | Hs6-32-3-7   | -----                                                        | not present                                              | no  | -----                 | Tomlins et al.<br>Nat. Genet (2007)         |
|                   | spotted cDNA             | GEO data      | Hs6-8-13-3   | -----                                                        | present                                                  | yes | DOWN *                |                                             |
| <b>Vanaja</b>     | U133A                    | Oncomine      | 213299_at    | ZTBT7A <sup>a</sup>                                          | -----                                                    | yes | NO CHANGE             | Vanaja et al. Cancer<br>Res (2003)          |
|                   | U133A                    | Oncomine      | 213303_x_at  | ZBTB7A                                                       | -----                                                    | yes | UP *                  |                                             |
|                   | U133A                    | Oncomine      | 222082_at    | intronic                                                     | -----                                                    | no  | -----                 |                                             |
|                   | U133B                    | Oncomine      | 230709_x_at  | ZBTB7A                                                       | -----                                                    | yes | DOWN *                |                                             |
|                   | U133B                    | Oncomine      | 226554_at    | ZBTB7A                                                       | -----                                                    | yes | NO CHANGE             |                                             |
| <b>Lapointe</b>   | spotted cDNA             | Oncomine      | Hs6-32-3-7   | -----                                                        | -----                                                    | yes | NO CHANGE             | Lapointe et al. PNAS<br>(2004)              |
|                   | spotted cDNA             | Oncomine      | Hs6-8-13-3   | -----                                                        | -----                                                    | yes | NO CHANGE             |                                             |
| <b>Stephenson</b> | U133A                    | GEO data      | 213299_at    | ZTBT7A <sup>a</sup>                                          | not present                                              | no  | -----                 | Stephenson et al.<br>Cancer (2005)          |
|                   | U133A                    | GEO data      | 213303_x_at  | ZBTB7A                                                       | present                                                  | yes | DOWN *                |                                             |
|                   | U133A                    | GEO data      | 222082_at    | intronic                                                     | not present                                              | no  | -----                 |                                             |
|                   | U133A                    | GEO data      | 219186_at    | intergenic                                                   | present                                                  | no  | -----                 |                                             |
| <b>Liu</b>        | U133A                    | Array Express | 213299_at    | ZTBT7A <sup>a</sup>                                          | not present                                              | no  | -----                 | Liu P. et al. Cancer<br>Res (2006)          |
|                   | U133A                    | Array Express | 213303_x_at  | ZBTB7A                                                       | not present                                              | no  | -----                 |                                             |
|                   | U133A                    | Array Express | 222082_at    | intronic                                                     | not present                                              | no  | -----                 |                                             |
|                   | U133A                    | Array Express | 219186_at    | intergenic                                                   | present                                                  | no  | -----                 |                                             |
|                   | U133B                    | Array Express | 230709_x_at  | ZBTB7A                                                       | not present                                              | no  | -----                 |                                             |
|                   | U133B                    | Array Express | 226554_at    | ZBTB7A                                                       | not present                                              | no  | -----                 |                                             |
| <b>Luo</b>        | U95A_V2                  | Oncomine      | 39540_at     | ZTBT7A <sup>a</sup>                                          | -----                                                    | yes | NO CHANGE             | Luo JH et al.<br>Mol Carcinog (2002)        |
|                   | Hu35kSub_A               | Oncomine      | AF000561_at  | ZTBT7A <sup>a</sup>                                          | -----                                                    | yes | DOWN *                |                                             |
|                   | Hu35kSub_A               | Oncomine      | H14210_s_at  | ZBTB7A                                                       | -----                                                    | yes | NO CHANGE             |                                             |
|                   | Hu35kSub_D               | Oncomine      | RC_F04371_at | intergenic                                                   | -----                                                    | no  | -----                 |                                             |
| <b>Taylor</b>     | Human Exon 1.0 ST Array  | GEO data      | 13564        | ZBTB7A                                                       | -----                                                    | yes | DOWN *                | Taylor et al. Cancer<br>Cell (2010)         |
| <b>LaTulippe</b>  | U95A_V2                  | Oncomine      | 39540_at     | ZTBT7A <sup>a</sup>                                          | -----                                                    | yes | DOWN *                | LaTulippe et al.<br>Cancer Res (2002)       |
| <b>Arredouani</b> | U133 Plus2               | Oncomine      | 213299_at    | ZTBT7A <sup>a</sup>                                          | -----                                                    | yes | NO CHANGE             | Arredouani et al. Clin<br>Cancer Res (2009) |
|                   | U133 Plus2               | Oncomine      | 213303_x_at  | ZBTB7A                                                       | -----                                                    | yes | NO CHANGE             |                                             |
|                   | U133 Plus2               | Oncomine      | 222082_at    | intronic                                                     | -----                                                    | no  | -----                 |                                             |
|                   | U133 Plus2               | Oncomine      | 230709_x_at  | ZBTB7A                                                       | -----                                                    | yes | UP *                  |                                             |
|                   | U133 Plus2               | Oncomine      | 226554_at    | ZBTB7A                                                       | -----                                                    | yes | DOWN *                |                                             |
| <b>Grasso</b>     | Agilent Human Genome 44K | Oncomine      | A_23_P16423  | -----                                                        | -----                                                    | yes | DOWN *                | Grasso et al.<br>Nature (2012)              |
|                   | Agilent Human Genome 44K | Oncomine      | A_23_P27827  | -----                                                        | -----                                                    | yes | DOWN *                |                                             |
| <b>Wallace</b>    | U133A 2.0                | Oncomine      | 213299_at    | ZTBT7A <sup>a</sup>                                          | -----                                                    | yes | NO CHANGE             | Wallace et al. Cancer<br>Res (2008)         |
|                   | U133A 2.0                | Oncomine      | 213303_x_at  | ZBTB7A                                                       | -----                                                    | yes | NO CHANGE             |                                             |
|                   | U133A 2.0                | Oncomine      | 222082_at    | intronic                                                     | -----                                                    | no  | -----                 |                                             |

<sup>1</sup> Based on BLAT (UCSC Genome Browser) and BLAST (NCBI)

<sup>2</sup> Present: detectable signal in more than 60% of samples; Non present: detectable signal in less than 60% of samples

<sup>3</sup> significance (\*) when  $p \leq 0.05$ ; NO\_CHANGE => FoldChange ~ 1

<sup>a</sup> possibility of cross-hybridization with other ZBTB family genes

## Suppl. Table 7: Clinical information from human specimens collected on TMAs

| Number | Age | Organ    | Dignosis               | Grade | Gleason | Type      |
|--------|-----|----------|------------------------|-------|---------|-----------|
| 1      | 60  | Prostate | Adenocarcinoma         |       | 1 2+1   | Malignant |
| 2      | 70  | Prostate | Adenocarcinoma         |       | 3 4+4   | Malignant |
| 3      | 66  | Prostate | Adenocarcinoma         |       | 2 1+2   | Malignant |
| 4      | 76  | Prostate | Adenocarcinoma         |       | 3 2+2   | Malignant |
| 5      | 64  | Prostate | Adenocarcinoma         |       | 2 2+2   | Malignant |
| 6      | 75  | Prostate | Adenocarcinoma         |       | 1 1+2   | Malignant |
| 7      | 72  | Prostate | Adenocarcinoma         |       | 2 2+4   | Malignant |
| 8      | 61  | Prostate | Adenocarcinoma         |       | 2 3+4   | Malignant |
| 9      | 72  | Prostate | Adenocarcinoma         |       | 3 4+5   | Malignant |
| 10     | 54  | Prostate | Adenocarcinoma         |       | 2 3+4   | Malignant |
| 11     | 68  | Prostate | Adenocarcinoma         |       | 3 4+5   | Malignant |
| 12     | 70  | Prostate | Adenocarcinoma         |       | 2 3+5   | Malignant |
| 13     | 63  | Prostate | Adenocarcinoma         |       | 2 3+5   | Malignant |
| 14     | 80  | Prostate | Adenocarcinoma         |       | 2 5+3   | Malignant |
| 15     | 75  | Prostate | Adenocarcinoma         |       | 2 4+5   | Malignant |
| 16     | 65  | Prostate | Adenocarcinoma         |       | 3 4+5   | Malignant |
| 17     | 69  | Prostate | Adenocarcinoma         |       | 2 3+4   | Malignant |
| 18     | 67  | Prostate | Adenocarcinoma         |       | 3 4+5   | Malignant |
| 19     | 74  | Prostate | Adenocarcinoma         |       | 2 3+4   | Malignant |
| 20     | 76  | Prostate | Adenocarcinoma         |       | 2 2+5   | Malignant |
| 21     | 55  | Prostate | Adenocarcinoma         |       | 2 2+4   | Malignant |
| 22     | 57  | Prostate | Adenocarcinoma         |       | 3 4+5   | Malignant |
| 23     | 77  | Prostate | Adenocarcinoma         |       | 3 4+5   | Malignant |
| 24     | 73  | Prostate | Adenocarcinoma         |       | 3 4+5   | Malignant |
| 25     | 76  | Prostate | Adenocarcinoma         |       | 3 5+4   | Malignant |
| 26     | 82  | Prostate | Adenocarcinoma         |       | 3 5+4   | Malignant |
| 27     | 78  | Prostate | Adenocarcinoma         |       | 3 5+4   | Malignant |
| 28     | 63  | Prostate | Adenocarcinoma         |       | 3 5+5   | Malignant |
| 29     | 69  | Prostate | Adenocarcinoma         |       | 3 3+5   | Malignant |
| 30     | 73  | Prostate | Adenocarcinoma         |       | 3 5+5   | Malignant |
| 31     | 65  | Prostate | Adenocarcinoma         |       | 3 5+5   | Malignant |
| 32     | 83  | Prostate | Adenocarcinoma         |       | 3 4+5   | Malignant |
| 33     | 64  | Prostate | Adenocarcinoma         |       | 2 3+4   | Malignant |
| 34     | 64  | Prostate | Adenocarcinoma         |       | 3 4+5   | Malignant |
| 35     | 69  | Prostate | Adenocarcinoma         |       | 3 5+5   | Malignant |
| 36     | 73  | Prostate | Adenocarcinoma         |       | 2 3+5   | Malignant |
| 37     | 51  | Prostate | Adenocarcinoma         |       | 2 3+4   | Malignant |
| 38     | 71  | Prostate | Adenocarcinoma         |       | 3 4+5   | Malignant |
| 39     | 66  | Prostate | Adenocarcinoma         |       | 3 5+4   | Malignant |
| 40     | 70  | Prostate | Adenocarcinoma         |       | 2 4+5   | Malignant |
| 41     | 60  | Prostate | Adenocarcinoma         |       | 3 5+5   | Malignant |
| 42     | 70  | Prostate | Adenocarcinoma         |       | 3 5+5   | Malignant |
| 43     | 57  | Prostate | Adenocarcinoma         |       | 3 5+4   | Malignant |
| 44     | 73  | Prostate | Adenocarcinoma         |       | 3 5+4   | Malignant |
| 45     | 73  | Prostate | Adenocarcinoma         |       | 3 5+4   | Malignant |
| 46     | 60  | Prostate | Adenocarcinoma         |       | 3 5+4   | Malignant |
| 47     | 72  | Prostate | Adenocarcinoma         |       | 3 5+4   | Malignant |
| 48     | 62  | Prostate | Adenocarcinoma         |       | 3 5+4   | Malignant |
| 49     | 67  | Prostate | Adenocarcinoma         |       | 3 4+5   | Malignant |
| 50     | 55  | Prostate | Adenocarcinoma         |       | 3 4+5   | Malignant |
| 51     | 70  | Prostate | Normal prostate tissue | -     | -       |           |
| 52     | 65  | Prostate | Normal prostate tissue | -     | -       |           |
| 53     | 72  | Prostate | Normal prostate tissue | -     | -       |           |
| 54     | 71  | Prostate | Normal prostate tissue | -     | -       |           |
| 55     | 63  | Prostate | Normal prostate tissue | -     | -       |           |
| 56     | 27  | Prostate | Normal prostate tissue | -     | -       |           |
| 57     | 25  | Prostate | Normal prostate tissue | -     | -       |           |
| 58     | 21  | Prostate | Normal prostate tissue | -     | -       |           |
| 59     | 48  | Prostate | Normal prostate tissue | -     | -       |           |

## Suppl. Table 8: Primers sequence

PtenLoxP\_Fwd 5'-AAAAGTTCCCCTGCTGATGATTTGT-3'  
PtenLoxP\_Rev 5'-TGTTTTTGACCAATTAAGTAGGCTGTG-3'

PCFW1 5'-TCTGAGGCCCGGTGCAT-3'  
PCFW2 5'-AGGGTGGTGCTCCCTCTAGAC-3'  
PCFW3 5'-ACCGCGGTCTAGGGATCC-3'  
PCRv 5'-GCTTGGGCTCCCCATGTAG-3'  
PCNeo 5'-GGATGTGGAATGTGTGCGAG-3'

MIA1\_Fwd 5'-CTGGGCAACAGAGCAAGACT-3'  
MIA1\_Rev 5'-ACTGCAGCCTCAACCTCCTA-3'

H19\_Fwd 5'-GTGTCCCCATTCTTTGGATG-3'  
H19\_Rev 5'-TGGTGAGACAGAAGGGGAAG-3'

DMBT1\_Fwd 5'-GAACAGTGCATGGCAAAGAA-3'  
DMBT1\_Rev 5'-GACAGCTTTCCAGGACTTGC-3'
